# Supplementary material for: The Effects of Sequence Variation on Genome-wide NRF2 Binding—New Target Genes and Regulatory SNPs
Source: PubMed Central journal article supplement — Nucleic Acids Res. 2016 Jan 29;44(4):1760–75. doi: 10.1093/nar/gkw052 (PMC4770247; doi:10.1093/nar/gkw052), 2016-01-29
Supplement: supp_gkw052_nar-03738-z-2015-File002.pdf [file supp_gkw052_nar-03738-z-2015-File002.pdf]

## Supplementary Methods

### Generation of allelic fasta records for dbSNP137 and conversion to blast database

In order to map 11 nt candidate binding sequences to SNP alleles, the optimum are sequences that have 10 nt on either flank of the allelic nucleotides, i.e. 21 nt in total for 1 nt alleles (or 20 nt for deletions); if they were any shorter, alleles mapping to the ends of the candidate would be missed, or any longer, computational effort would be unnecessarily increased due to futile mapping attempts along the flanking sequences only, i.e. where the candidate could not overlap the position of the allele. To facilitate the mapping of allelic SNP data base (or any subset thereof), chromosome-wise reference SNP (rs) fasta files for dbSNP version 137, containing the records for a total of 52,283,020 rsIDs, were downloaded on Sept 2, 2012 from [ftp://ftp.ncbi.nlm.nih.gov/snp/organisms/human\\_9606/rs\\_fasta/](ftp://ftp.ncbi.nlm.nih.gov/snp/organisms/human_9606/rs_fasta/), and processed with a custom perl script to contain, if available, 10 nt flanks on both sides of the allelic sequence. In detail, for each rsID, the nucleotide sequences for known alleles were extracted from the fasta header attribute 'alleles', and the flanking sequences were clipped to 10 nt from the provided, typically longer flanks surrounding the SNP position. Those few rsIDs that came without allele information (103,378, or 0.198 %) were not included in the final set of 105,205,157 allelic sequences for 52,179,642 rsID. Of note, a very small minority of these only has 4-9 nt flank on either side due to availability in the original rs fasta record (1782 rsIDs, or 0.0034%).

To enable efficient search for explicit 11 nt binder candidates, the above allelic fasta set (for chromosomes 1-22, X and Y) was converted to a blast source database using the program makeblastdb (NCBI blast engine version 2.2.29+) with the following essential command line arguments: `-input_type fasta -dbtype nucl`.

### Supplementary Figure Legends

**Figure S1.** Overview of simulated structures of **(A)** Nrf2-MafG and **(B)** MafG-Nrf2 bound to DNA (5'-CAGTGACTCAGCAG-3') are shown at the time point of 10 ns together with detailed views of **(C)** Nrf2-MafG – DNA and **(D)** MafG-Nrf2 – DNA binding modes, without protein-DNA-main chain contacts. Schematic presentation of protein – DNA interactions of **(E)** Nrf2-MafG and **(F)** MafG-Nrf2 are illustrated using cyan marks for Nrf2 and green marks for MafG. Elliptical shapes stand for hydrogen bond interactions and round shaped plots for hydrophobic van der Waals' contacts.

**Figure S2.** C $\alpha$  RMSD plot illustrating the simulation stability. Nrf2-MafG-DNA is shown in blue, MafG-Nrf2-DNA in orange, Nrf2-Nrf2-DNA in grey and MafG-MafG-DNA in yellow. MafG-Nrf2-DNA and Nrf2-Nrf2-DNA compositions fluctuate more compared to the other two after 3 ns of simulation.

**Figure S3.** Detailed views of the **(A-B)** Nrf2-MafG – DNA (5'-CAGTGACTCAGCAG-3') and **(C-D)** MafG-Nrf2 – DNA (5'-CAGTGACTCAGCAG-3') end point structures from the 10 ns molecular dynamics simulations. Nrf2 is shown in cyan and MafG in green. Selected protein - DNA main chain interactions are also shown.

**Figure S4.** Image showing upper parts of helices at the time point of 10 ns for Nrf2-Nrf2 (cyan) and MafG- MafG (green). For Nrf2 homodimer, a distortion at the helical structure of subunit B occurred after 3 ns of simulation. Simulations suggest that hydrogen bonding network close to N100 is less stable for the Nrf2 homodimer than the corresponding interactions formed by N83 in the MafG homodimer.

**Figure S5.** Small Maf-Nrf2 heterodimer binding on single variation series. Results are depicted as measured binding relative to NQO1.ARE binding ( $n=9$ ).

**Figure S6.** Pearson correlations of the predicted and measured binding strengths for i) ChIP-seq multivariate ARE sequences with new NRF2 binding model **(A)** and PWM **(B)**, ii) for position 6-8 variations with new NRF2 binding model **(C)** and PWM **(D)**, and iii) for all measured ARE sequences with NRF2 binding model **(E)** and PWM **(F)**.

### Supplementary Tables

**Table S1.** Oligonucleotides for cloning

**Table S2.** Oligonucleotides for protein binding microarrays (single variations)

**Table S3.** Oligonucleotides for protein binding microarrays (multiple variations)

**Table S4.** Nrf2 binding sites in hg19: subset strong (> 0.9 relative binding strength). Locations are given in BED6 format (separate file), and can be viewed either in table format (xls) or with visualization tools, such as Integrative Genomics Viewer (IGV) (<https://www.broadinstitute.org/igv/>) or UCSC Genome Browser (<https://genome.ucsc.edu/>).

**Table S5.** Interactions between the protein and DNA atoms in the Nrf2-MafG – DNA and MafG-Nrf2 – DNA complexes. Interactions, excluding protein – phosphate backbone interactions, are listed for the base pairs of the GTGACTCAGCA sequence for the average structure of the last 1 ns and the end-point structure of the 10 ns MD simulation. Interactions most important for binding specificity are shown in bold.

**Table S6.** Single nucleotide variations

**Table S7.** Multivariate AREs from ChIP-seq motif detection

**Table S8.** Multivariate oligos for binding limit detection

**Table S9.** Candidate Nrf2 rSNPs. rSNPs are listed in table format (xls) on a separate file.

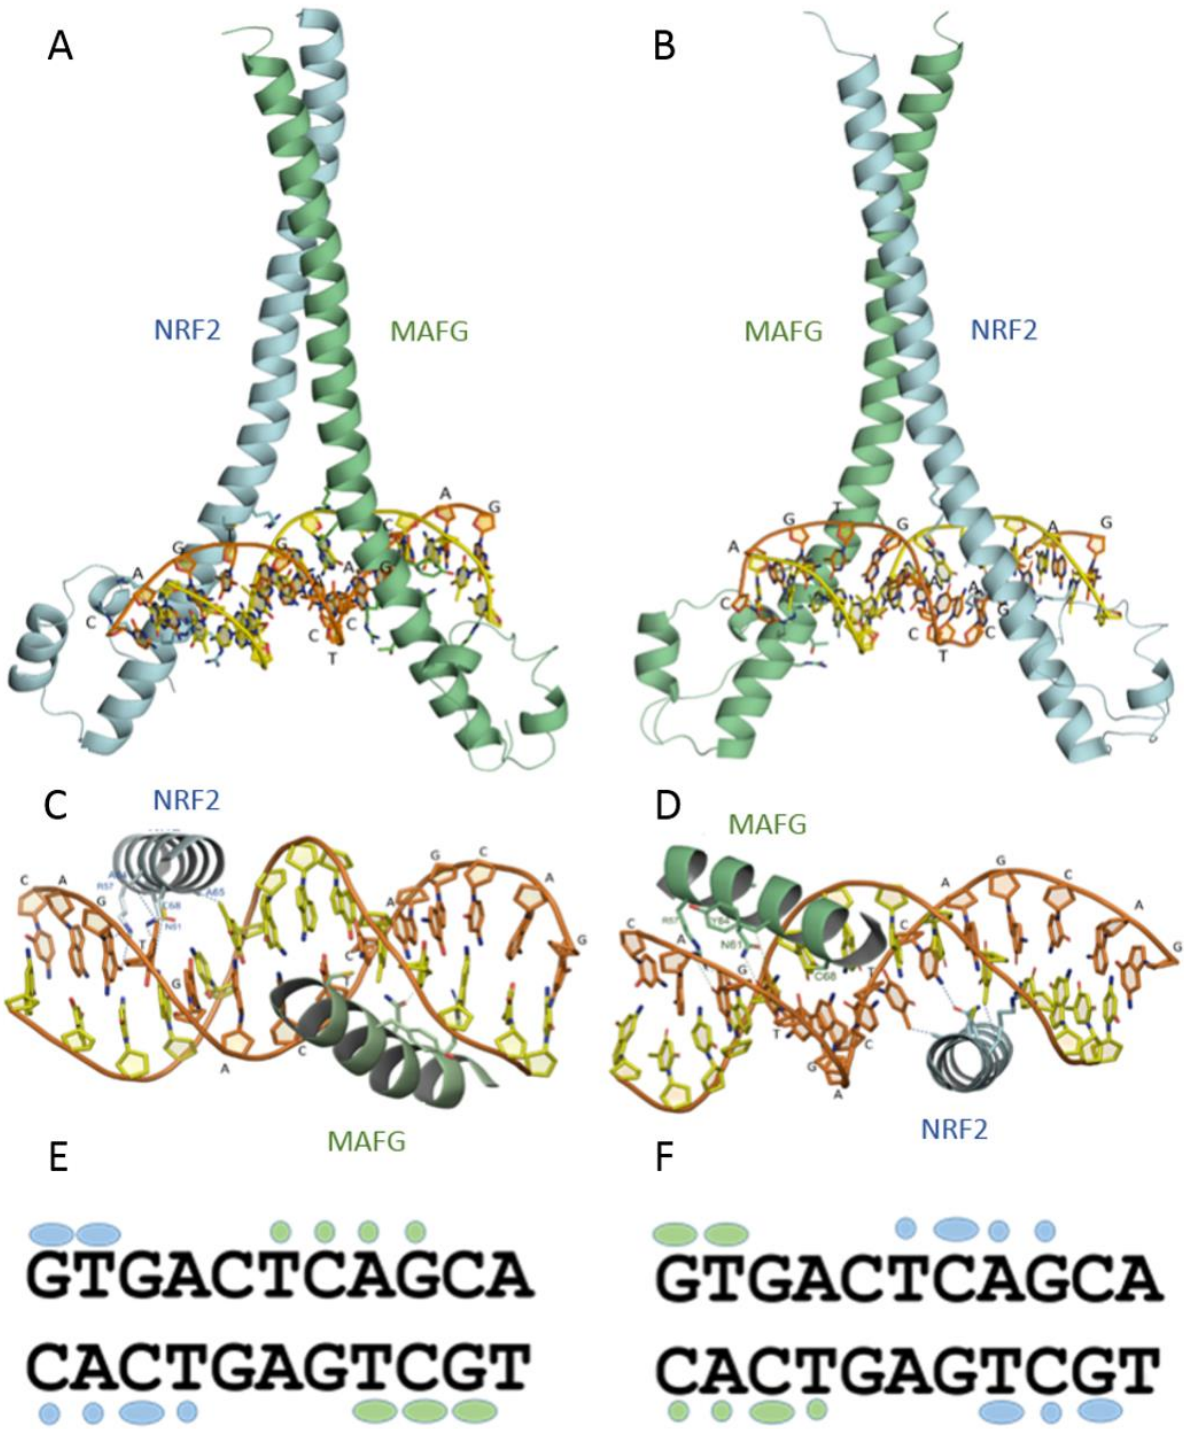

Figure S1.

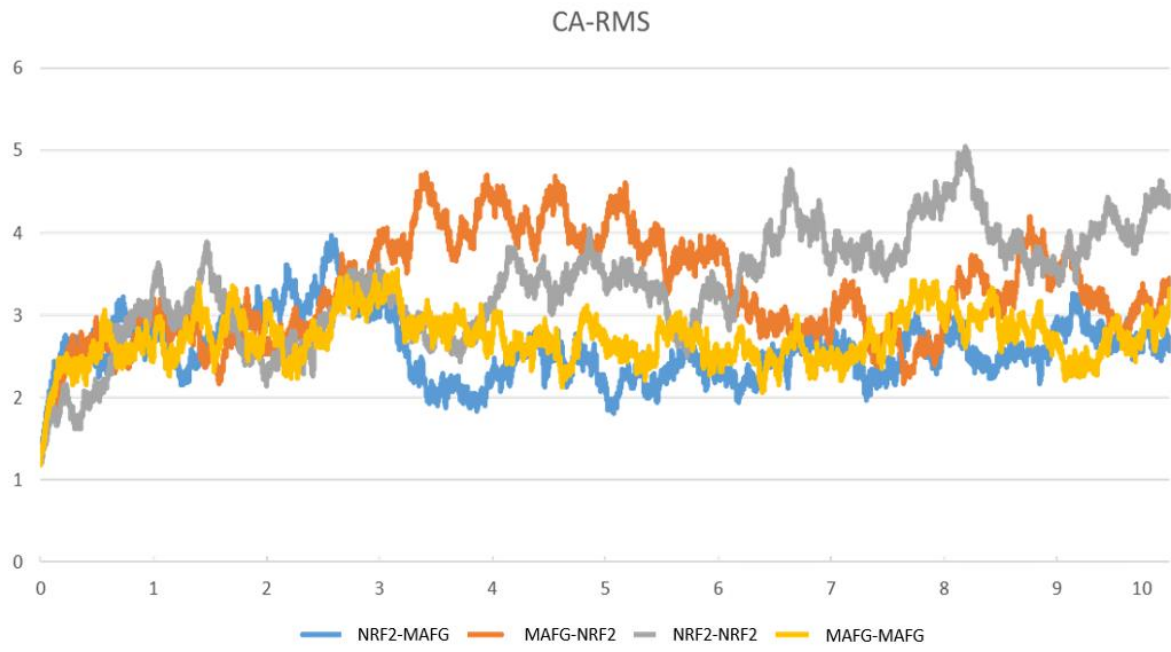

Figure S2.

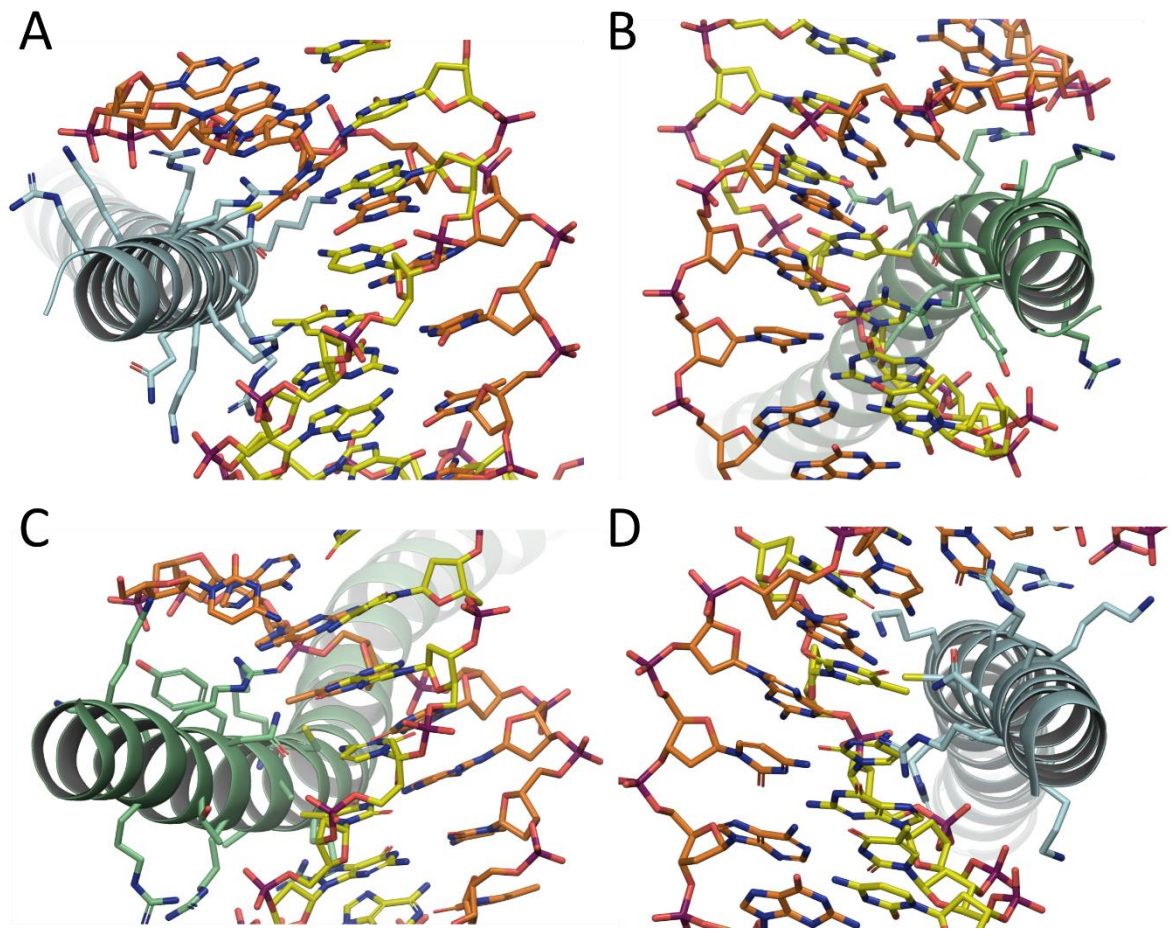

Figure S3.

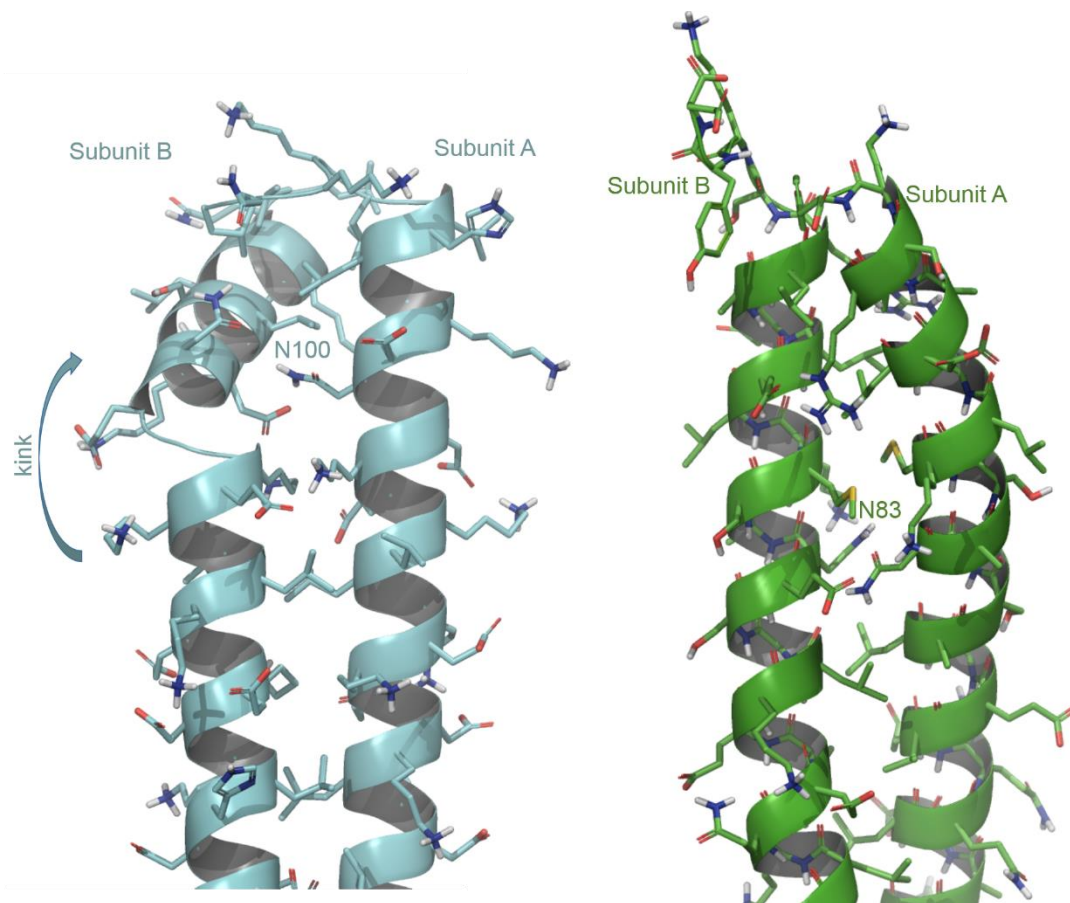

Figure S4.

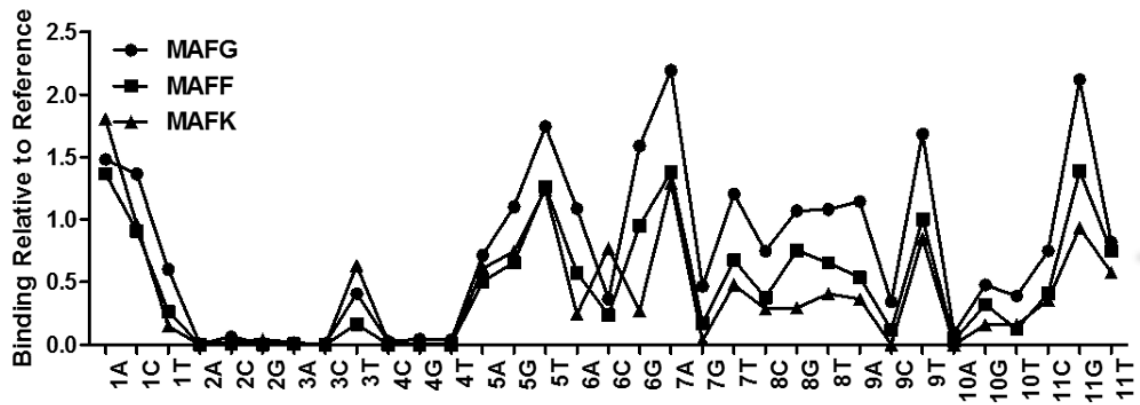

Figure S5.



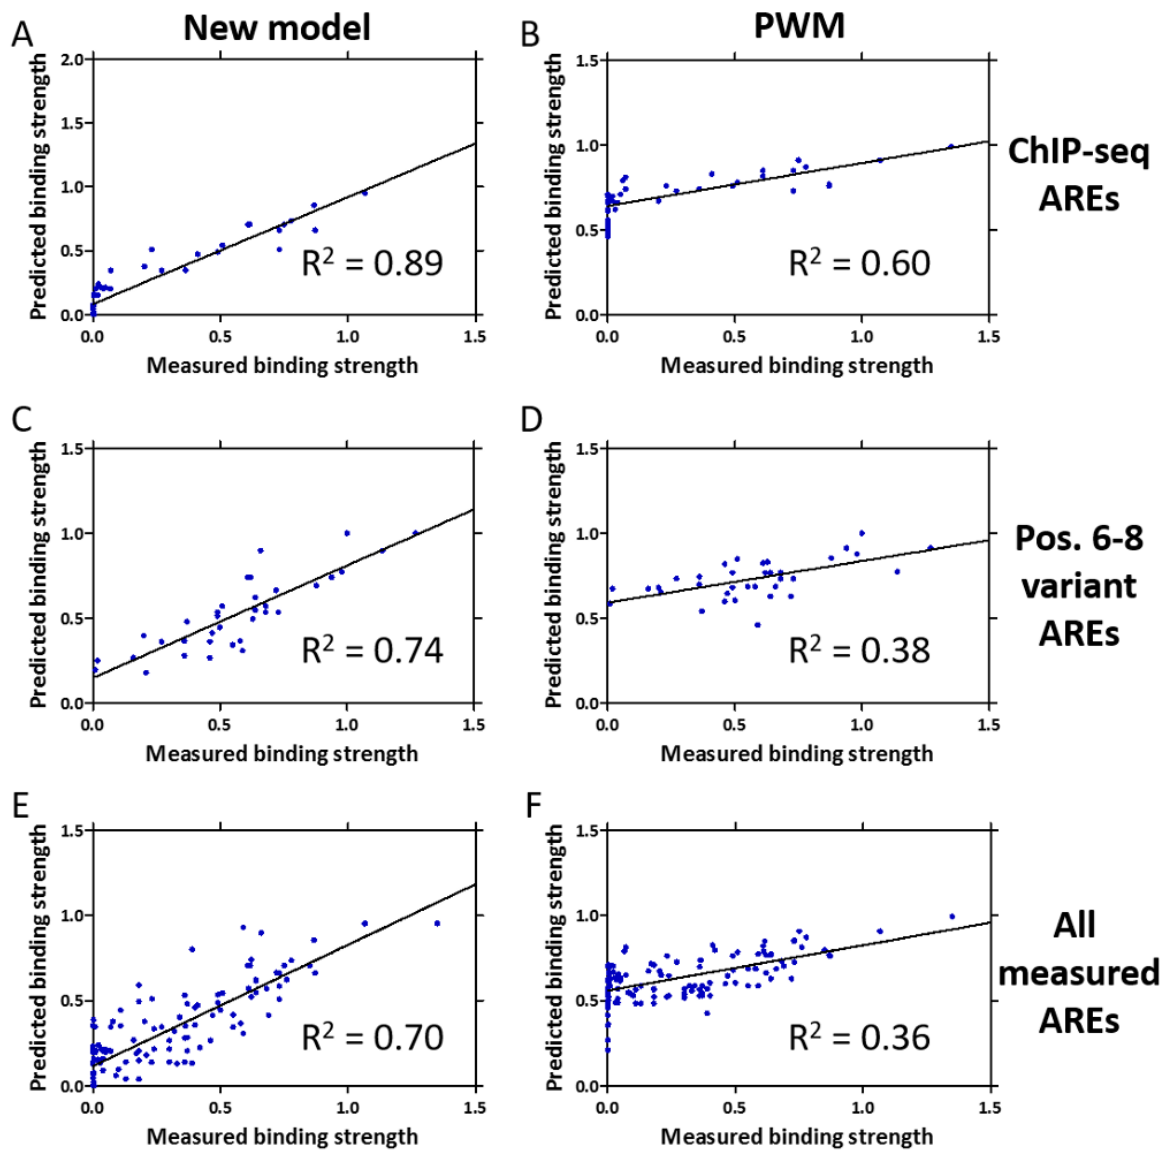

Figure S6.



**Table S1.**

| <b>Primer</b>          | <b>Sequence</b>                            |
|------------------------|--------------------------------------------|
| <b>MAF F sense</b>     | 5'-AATAAGCTTGCCACCATGTCTGTGGATCCCCTATCC-3' |
| <b>MAF F antisense</b> | 5'-AAAGAATTCAGTAGGAGCAGGAGGCCG-3'          |
| <b>MAF K sense</b>     | 5'-AATAAGCTTGCCACCATGACGACTAATCCCAAACCG-3' |
| <b>MAF K antisense</b> | 5'-AAAGAATTCCTAGGATGCAGCCGAGAAGG-3'        |
| <b>SNP A forward</b>   | 5' CTCAGCATGACTCAGCAGTCGCGAGCT 3'          |
| <b>SNP A reverse</b>   | 5' CGCGACTGCTGAGTCATGCTGAGGTAC 3'          |
| <b>SNP C forward</b>   | 5' CTCAGCATGCCTCAGCAGTCGCGAGCT 3'          |
| <b>SNP C reverse</b>   | 5' CGCGACTGCTGAGGCATGCTGAGGTAC 3'          |

Table S2.

| Name       | Sequence                                            | Name         | Sequence                                                         |
|------------|-----------------------------------------------------|--------------|------------------------------------------------------------------|
| <b>ARE</b> | 5'-<br>CCGCAGTCACAGTGA<br>CTCAGCAG<br>AATCTGAGCC-3' | <b>ARE_L</b> | 5'-<br>AAGTTGGGCGGTTGGGTGGCTCAGATTCTGCTGAGT<br>CACTGTGACTGCGG-3' |
| <b>1A</b>  | 5'-<br>CCGCAGTCACAATGA<br>CTCAGCAGA<br>ATCTGAGCC-3' | <b>1A_L</b>  | 5'-<br>AAGTTGGGCGGTTGGGTGGCTCAGATTCTGCTGAGT<br>CATTGTGACTGCGG-3' |
| <b>1C</b>  | 5'-<br>CCGCAGTCACACTGA<br>CTCAGCAGA<br>ATCTGAGCC-3' | <b>1C_L</b>  | 5'-<br>AAGTTGGGCGGTTGGGTGGCTCAGATTCTGCTGAGT<br>CAGTGTGACTGCGG-3' |
| <b>1T</b>  | 5'-<br>CCGCAGTCACATTGA<br>CTCAGCAGA<br>ATCTGAGCC-3' | <b>1T_L</b>  | 5'-<br>AAGTTGGGCGGTTGGGTGGCTCAGATTCTGCTGAGT<br>CAATGTGACTGCGG-3' |
| <b>2A</b>  | 5'-<br>CCGCAGTCACAGAGA<br>CTCAGCAG<br>AATCTGAGCC-3' | <b>2A_L</b>  | 5'-<br>AAGTTGGGCGGTTGGGTGGCTCAGATTCTGCTGAGT<br>CTCTGTGACTGCGG-3' |
| <b>2C</b>  | 5'-<br>CCGCAGTCACAGCGA<br>CTCAGCAG<br>AATCTGAGCC-3' | <b>2C_L</b>  | 5'-<br>AAGTTGGGCGGTTGGGTGGCTCAGATTCTGCTGAGT<br>CGCTGTGACTGCGG-3' |
| <b>2G</b>  | 5'-<br>CCGCAGTCACAGGGG<br>CTCAGCAG<br>AATCTGAGCC-3' | <b>2G_L</b>  | 5'-<br>AAGTTGGGCGGTTGGGTGGCTCAGATTCTGCTGAGT<br>CCCTGTGACTGCGG-3' |
| <b>3A</b>  | 5'-<br>CCGCAGTCACAGTAA<br>CTCAGCAGA<br>ATCTGAGCC-3' | <b>3A_L</b>  | 5'-<br>AAGTTGGGCGGTTGGGTGGCTCAGATTCTGCTGAGT<br>TACTGTGACTGCGG-3' |
| <b>3C</b>  | 5'-<br>CCGCAGTCACAGTCA<br>CTCAGCAGA<br>ATCTGAGCC-3' | <b>3C_L</b>  | 5'-<br>AAGTTGGGCGGTTGGGTGGCTCAGATTCTGCTGAGT<br>GACTGTGACTGCGG-3' |
| <b>3T</b>  | 5'-<br>CCGCAGTCACAGTTA<br>CTCAGCAGA<br>ATCTGAGCC-3' | <b>3T_L</b>  | 5'-<br>AAGTTGGGCGGTTGGGTGGCTCAGATTCTGCTGAGT<br>AACTGTGACTGCGG-3' |
| <b>4C</b>  | 5'-<br>CCGCAGTCACAGTGC<br>CTCAGCAGA<br>ATCTGAGCC-3' | <b>4C_L</b>  | 5'-<br>AAGTTGGGCGGTTGGGTGGCTCAGATTCTGCTGAGG<br>CACTGTGACTGCGG-3' |
| <b>4G</b>  | 5'-<br>CCGCAGTCACAGTGG<br>CTCAGCAG<br>AATCTGAGCC-3' | <b>4G_L</b>  | 5'-<br>AAGTTGGGCGGTTGGGTGGCTCAGATTCTGCTGAGC<br>CACTGTGACTGCGG-3' |
| <b>4T</b>  | 5'-<br>CCGCAGTCACAGTGT<br>CTCAGCAGA<br>ATCTGAGCC-3' | <b>4T_L</b>  | 5'-<br>AAGTTGGGCGGTTGGGTGGCTCAGATTCTGCTGAGA<br>CACTGTGACTGCGG-3' |
| <b>5A</b>  | 5'-<br>CCGCAGTCACAGTGA<br>ATCAGCAG<br>AATCTGAGCC-3' | <b>5A_L</b>  | 5'-<br>AAGTTGGGCGGTTGGGTGGCTCAGATTCTGCTGATT<br>CACTGTGACTGCGG-3' |
| <b>5G</b>  | 5'-<br>CCGCAGTCACAGTGA<br>GTCAGCAG<br>AATCTGAGCC-3' | <b>5G_L</b>  | 5'-<br>AAGTTGGGCGGTTGGGTGGCTCAGATTCTGCTGACT<br>CACTGTGACTGCGG-3' |
| <b>5T</b>  | 5'-<br>CCGCAGTCACAGTGA<br>TTCAGCAGA<br>ATCTGAGCC-3' | <b>5T_L</b>  | 5'-<br>AAGTTGGGCGGTTGGGTGGCTCAGATTCTGCTGAAT<br>CACTGTGACTGCGG-3' |

|            |                                                 |              |                                                                  |
|------------|-------------------------------------------------|--------------|------------------------------------------------------------------|
| <b>6A</b>  | 5'-<br>CCGCAGTCACAGTGACACAGCAG<br>AATCTGAGCC-3' | <b>6A_L</b>  | 5'-<br>AAGTTGGGCGGTTGGGTGGCTCAGATTCTGCTGTGT<br>CACTGTGACTGCGG-3' |
| <b>6C</b>  | 5'-<br>CCGCAGTCACAGTGACCCAGCAG<br>AATCTGAGCC-3' | <b>6C_L</b>  | 5'-<br>AAGTTGGGCGGTTGGGTGGCTCAGATTCTGCTGGGT<br>CACTGTGACTGCGG-3' |
| <b>6G</b>  | 5'-<br>CCGCAGTCACAGTGACGCAGCAG<br>AATCTGAGCC-3' | <b>6G_L</b>  | 5'-<br>AAGTTGGGCGGTTGGGTGGCTCAGATTCTGCTGCGT<br>CACTGTGACTGCGG-3' |
| <b>7A</b>  | 5'-<br>CCGCAGTCACAGTGACTAAGCAG<br>AATCTGAGCC-3' | <b>7A_L</b>  | 5'-<br>AAGTTGGGCGGTTGGGTGGCTCAGATTCTGCTTAGT<br>CACTGTGACTGCGG-3' |
| <b>7G</b>  | 5'-<br>CCGCAGTCACAGTGACTGAGCAG<br>AATCTGAGCC-3' | <b>7G_L</b>  | 5'-<br>AAGTTGGGCGGTTGGGTGGCTCAGATTCTGCTCAGT<br>CACTGTGACTGCGG-3' |
| <b>7T</b>  | 5'-<br>CCGCAGTCACAGTGACTTAGCAGA<br>ATCTGAGCC-3' | <b>7T_L</b>  | 5'-<br>AAGTTGGGCGGTTGGGTGGCTCAGATTCTGCTAAGT<br>CACTGTGACTGCGG-3' |
| <b>8C</b>  | 5'-<br>CCGCAGTCACAGTGACTCCGCAGA<br>ATCTGAGCC-3' | <b>8C_L</b>  | 5'-<br>AAGTTGGGCGGTTGGGTGGCTCAGATTCTGCGGAGT<br>CACTGTGACTGCGG-3' |
| <b>8G</b>  | 5'-<br>CCGCAGTCACAGTGACTCGGCAG<br>AATCTGAGCC-3' | <b>8G_L</b>  | 5'-<br>AAGTTGGGCGGTTGGGTGGCTCAGATTCTGCCGAGT<br>CACTGTGACTGCGG-3' |
| <b>8T</b>  | 5'-<br>CCGCAGTCACAGTGACTCTGCAGA<br>ATCTGAGCC-3' | <b>8T_L</b>  | 5'-<br>AAGTTGGGCGGTTGGGTGGCTCAGATTCTGCAGAGT<br>CACTGTGACTGCGG-3' |
| <b>9A</b>  | 5'-<br>CCGCAGTCACAGTGACTCAACAGA<br>ATCTGAGCC-3' | <b>9A_L</b>  | 5'-<br>AAGTTGGGCGGTTGGGTGGCTCAGATTCTGTTGAGT<br>CACTGTGACTGCGG-3' |
| <b>9C</b>  | 5'-<br>CCGCAGTCACAGTGACTCACCAGA<br>ATCTGAGCC-3' | <b>9C_L</b>  | 5'-<br>AAGTTGGGCGGTTGGGTGGCTCAGATTCTGGTGAGT<br>CACTGTGACTGCGG-3' |
| <b>9T</b>  | 5'-<br>CCGCAGTCACAGTGACTCATCAGA<br>ATCTGAGCC-3' | <b>9T_L</b>  | 5'-<br>AAGTTGGGCGGTTGGGTGGCTCAGATTCTGATGAGT<br>CACTGTGACTGCGG-3' |
| <b>10A</b> | 5'-<br>CCGCAGTCACAGTGACTCAGAAG<br>AATCTGAGCC-3' | <b>10A_L</b> | 5'-<br>AAGTTGGGCGGTTGGGTGGCTCAGATTCTTCTGAGT<br>CACTGTGACTGCGG-3' |
| <b>10G</b> | 5'-<br>CCGCAGTCACAGTGACTCAGGAG<br>AATCTGAGCC-3' | <b>10G_L</b> | 5'-<br>AAGTTGGGCGGTTGGGTGGCTCAGATTCTCCTGAGT<br>CACTGTGACTGCGG-3' |
| <b>10T</b> | 5'-<br>CCGCAGTCACAGTGACTCAGTAGA<br>ATCTGAGCC-3' | <b>10T_L</b> | 5'-<br>AAGTTGGGCGGTTGGGTGGCTCAGATTCTACTGAGT<br>CACTGTGACTGCGG-3' |
| <b>11C</b> | 5'-<br>CCGCAGTCACAGTGACTCAGCCGA<br>ATCTGAGCC-3' | <b>11C_L</b> | 5'-<br>AAGTTGGGCGGTTGGGTGGCTCAGATTCGGCTGAGT<br>CACTGTGACTGCGG-3' |
| <b>11G</b> | 5'-<br>CCGCAGTCACAGTGACTCAGCGG<br>AATCTGAGCC-3' | <b>11G_L</b> | 5'-<br>AAGTTGGGCGGTTGGGTGGCTCAGATTCGGCTGAGT<br>CACTGTGACTGCGG-3' |

|               |                                                |              |                                                                  |
|---------------|------------------------------------------------|--------------|------------------------------------------------------------------|
| <b>11T</b>    | 5'-<br>CCGCAGTCACAGTGA<br>CTCAGCTGATCTGAGCC-3' | <b>11T_L</b> | 5'-<br>AAGTTGGGCGGTTGGGTGGCTCAGATTCAGCTGAGT<br>CACTGTGACTGCGG-3' |
| <b>Primer</b> | 5'-ACCCAACCGCCCAACTT-Biotin-<br>3'             |              |                                                                  |

Table S3.

| Name        | Sequence                                        | Name          | Sequence                                                         |
|-------------|-------------------------------------------------|---------------|------------------------------------------------------------------|
| <b>mv1</b>  | 5'-<br>CCGCAGTCACAAGGACTCAGCAG<br>AATCTGAGCC-3' | <b>mv1_L</b>  | 5'-<br>AAGTTGGGCGGTTGGGTGGCTCAGATTCTGCTGAG<br>TCCTTGTGACTGCGG-3' |
| <b>mv2</b>  | 5'-<br>CCGCAGTCACAAGGACTAAGCAG<br>AATCTGAGCC-3' | <b>mv2_L</b>  | 5'-<br>AAGTTGGGCGGTTGGGTGGCTCAGATTCTGCTTAG<br>TCCTTGTGACTGCGG-3' |
| <b>mv3</b>  | 5'-<br>CCGCAGTCACAATCACACAGCAG<br>AATCTGAGCC-3' | <b>mv3_L</b>  | 5'-<br>AAGTTGGGCGGTTGGGTGGCTCAGATTCTGCTGTG<br>TGATTGTGACTGCGG-3' |
| <b>mv4</b>  | 5'-<br>CCGCAGTCACAATCACTAAGCAG<br>AATCTGAGCC-3' | <b>mv4_L</b>  | 5'-<br>AAGTTGGGCGGTTGGGTGGCTCAGATTCTGCTTAG<br>TGATTGTGACTGCGG-3' |
| <b>mv5</b>  | 5'-<br>CCGCAGTCACAATCACTCAGCAGA<br>ATCTGAGCC-3' | <b>mv5_L</b>  | 5'-<br>AAGTTGGGCGGTTGGGTGGCTCAGATTCTGCTGAG<br>TGATTGTGACTGCGG-3' |
| <b>mv6</b>  | 5'-<br>CCGCAGTCACAATCACTCCGCAGA<br>ATCTGAGCC-3' | <b>mv6_L</b>  | 5'-<br>AAGTTGGGCGGTTGGGTGGCTCAGATTCTGCGGAG<br>TGATTGTGACTGCGG-3' |
| <b>mv7</b>  | 5'-<br>CCGCAGTCACAATGACAAAGCAG<br>AATCTGAGCC-3' | <b>mv7_L</b>  | 5'-<br>AAGTTGGGCGGTTGGGTGGCTCAGATTCTGCTTTG<br>TCATTGTGACTGCGG-3' |
| <b>mv8</b>  | 5'-<br>CCGCAGTCACAATGACACAGCAG<br>AATCTGAGCC-3' | <b>mv8_L</b>  | 5'-<br>AAGTTGGGCGGTTGGGTGGCTCAGATTCTGCTGTG<br>TCATTGTGACTGCGG-3' |
| <b>mv9</b>  | 5'-<br>CCGCAGTCACAATGACACCGCAG<br>AATCTGAGCC-3' | <b>mv9_L</b>  | 5'-<br>AAGTTGGGCGGTTGGGTGGCTCAGATTCTGCGGTG<br>TCATTGTGACTGCGG-3' |
| <b>mv10</b> | 5'-<br>CCGCAGTCACAATGACACGGCAG<br>AATCTGAGCC-3' | <b>mv10_L</b> | 5'-<br>AAGTTGGGCGGTTGGGTGGCTCAGATTCTGCCGTG<br>TCATTGTGACTGCGG-3' |
| <b>mv11</b> | 5'-<br>CCGCAGTCACAATGACAGAGCAG<br>AATCTGAGCC-3' | <b>mv11_L</b> | 5'-<br>AAGTTGGGCGGTTGGGTGGCTCAGATTCTGCTCTG<br>TCATTGTGACTGCGG-3' |
| <b>mv12</b> | 5'-<br>CCGCAGTCACAATGACATAGCAG<br>AATCTGAGCC-3' | <b>mv12_L</b> | 5'-<br>AAGTTGGGCGGTTGGGTGGCTCAGATTCTGCTATG<br>TCATTGTGACTGCGG-3' |
| <b>mv13</b> | 5'-<br>CCGCAGTCACAATGACCAAGCAG<br>AATCTGAGCC-3' | <b>mv13_L</b> | 5'-<br>AAGTTGGGCGGTTGGGTGGCTCAGATTCTGCTTGG<br>TCATTGTGACTGCGG-3' |
| <b>mv14</b> | 5'-<br>CCGCAGTCACAATGACCCAGCAG<br>AATCTGAGCC-3' | <b>mv14_L</b> | 5'-<br>AAGTTGGGCGGTTGGGTGGCTCAGATTCTGCTGGG<br>TCATTGTGACTGCGG-3' |
| <b>mv15</b> | 5'-<br>CCGCAGTCACAATGACCCGGCAG<br>AATCTGAGCC-3' | <b>mv15_L</b> | 5'-<br>AAGTTGGGCGGTTGGGTGGCTCAGATTCTGCCGGG<br>TCATTGTGACTGCGG-3' |
| <b>mv16</b> | 5'-<br>CCGCAGTCACAATGACGCAGCAG<br>AATCTGAGCC-3' | <b>mv16_L</b> | 5'-<br>AAGTTGGGCGGTTGGGTGGCTCAGATTCTGCTGCG<br>TCATTGTGACTGCGG-3' |

|             |                                                 |               |                                                                  |
|-------------|-------------------------------------------------|---------------|------------------------------------------------------------------|
| <b>mv17</b> | 5'-<br>CCGCAGTCACAATGACTAAGCAG<br>AATCTGAGCC-3' | <b>mv17_L</b> | 5'-<br>AAGTTGGGCGGTTGGGTGGCTCAGATTCTGCTTAG<br>TCATTGTGACTGCGG-3' |
| <b>mv18</b> | 5'-<br>CCGCAGTCACAATGACTAGGCAG<br>AATCTGAGCC-3' | <b>mv18_L</b> | 5'-<br>AAGTTGGGCGGTTGGGTGGCTCAGATTCTGCCTAG<br>TCATTGTGACTGCGG-3' |
| <b>mv19</b> | 5'-<br>CCGCAGTCACAATGACTCAGCAG<br>AATCTGAGCC-3' | <b>mv19_L</b> | 5'-<br>AAGTTGGGCGGTTGGGTGGCTCAGATTCTGCTGAG<br>TCATTGTGACTGCGG-3' |
| <b>mv20</b> | 5'-<br>CCGCAGTCACAATGACTCCGCAG<br>AATCTGAGCC-3' | <b>mv20_L</b> | 5'-<br>AAGTTGGGCGGTTGGGTGGCTCAGATTCTGCGGAG<br>TCATTGTGACTGCGG-3' |
| <b>mv21</b> | 5'-<br>CCGCAGTCACAATGACTCGGCAG<br>AATCTGAGCC-3' | <b>mv21_L</b> | 5'-<br>AAGTTGGGCGGTTGGGTGGCTCAGATTCTGCCGAG<br>TCATTGTGACTGCGG-3' |
| <b>mv22</b> | 5'-<br>CCGCAGTCACAATGACTCTGCAG<br>AATCTGAGCC-3' | <b>mv22_L</b> | 5'-<br>AAGTTGGGCGGTTGGGTGGCTCAGATTCTGCAGAG<br>TCATTGTGACTGCGG-3' |
| <b>mv23</b> | 5'-<br>CCGCAGTCACAATGACTGAGCAG<br>AATCTGAGCC-3' | <b>mv23_L</b> | 5'-<br>AAGTTGGGCGGTTGGGTGGCTCAGATTCTGCTCAG<br>TCATTGTGACTGCGG-3' |
| <b>mv24</b> | 5'-<br>CCGCAGTCACAATGACTTAGCAG<br>AATCTGAGCC-3' | <b>mv24_L</b> | 5'-<br>AAGTTGGGCGGTTGGGTGGCTCAGATTCTGCTAAG<br>TCATTGTGACTGCGG-3' |
| <b>mv25</b> | 5'-<br>CCGCAGTCACAATGACTTGGCAG<br>AATCTGAGCC-3' | <b>mv25_L</b> | 5'-<br>AAGTTGGGCGGTTGGGTGGCTCAGATTCTGCCAAG<br>TCATTGTGACTGCGG-3' |
| <b>mv26</b> | 5'-<br>CCGCAGTCACAATGCCACAGCAG<br>AATCTGAGCC-3' | <b>mv26_L</b> | 5'-<br>AAGTTGGGCGGTTGGGTGGCTCAGATTCTGCTGTG<br>GCATTGTGACTGCGG-3' |
| <b>mv27</b> | 5'-<br>CCGCAGTCACAATGCCCCAGCAG<br>AATCTGAGCC-3' | <b>mv27_L</b> | 5'-<br>AAGTTGGGCGGTTGGGTGGCTCAGATTCTGCTGGG<br>GCATTGTGACTGCGG-3' |
| <b>mv28</b> | 5'-<br>CCGCAGTCACAATGCCTCAGCAG<br>AATCTGAGCC-3' | <b>mv28_L</b> | 5'-<br>AAGTTGGGCGGTTGGGTGGCTCAGATTCTGCTGAG<br>GCATTGTGACTGCGG-3' |
| <b>mv29</b> | 5'-<br>CCGCAGTCACAATGGCTAAGCAG<br>AATCTGAGCC-3' | <b>mv29_L</b> | 5'-<br>AAGTTGGGCGGTTGGGTGGCTCAGATTCTGCTTAG<br>CCATTGTGACTGCGG-3' |
| <b>mv30</b> | 5'-<br>CCGCAGTCACAATGGCTCAGCAG<br>AATCTGAGCC-3' | <b>mv30_L</b> | 5'-<br>AAGTTGGGCGGTTGGGTGGCTCAGATTCTGCTGAG<br>CCATTGTGACTGCGG-3' |
| <b>mv31</b> | 5'-<br>CCGCAGTCACAATGTCACAGCAG<br>AATCTGAGCC-3' | <b>mv31_L</b> | 5'-<br>AAGTTGGGCGGTTGGGTGGCTCAGATTCTGCTGTG<br>ACATTGTGACTGCGG-3' |
| <b>mv32</b> | 5'-<br>CCGCAGTCACAATGTCTAAGCAG<br>AATCTGAGCC-3' | <b>mv32_L</b> | 5'-<br>AAGTTGGGCGGTTGGGTGGCTCAGATTCTGCTTAG<br>ACATTGTGACTGCGG-3' |
| <b>mv33</b> | 5'-<br>CCGCAGTCACAATGTCTCAGCAG<br>AATCTGAGCC-3' | <b>mv33_L</b> | 5'-<br>AAGTTGGGCGGTTGGGTGGCTCAGATTCTGCTGAG<br>ACATTGTGACTGCGG-3' |

|             |                                                 |               |                                                                  |
|-------------|-------------------------------------------------|---------------|------------------------------------------------------------------|
| <b>mv34</b> | 5'-<br>CCGCAGTCACAATTACACAGCAG<br>AATCTGAGCC-3' | <b>mv34_L</b> | 5'-<br>AAGTTGGGCGGTTGGGTGGCTCAGATTCTGCTGTG<br>TAATTGTGACTGCGG-3' |
| <b>mv35</b> | 5'-<br>CCGCAGTCACAATTACCCAGCAGA<br>ATCTGAGCC-3' | <b>mv35_L</b> | 5'-<br>AAGTTGGGCGGTTGGGTGGCTCAGATTCTGCTGGG<br>TAATTGTGACTGCGG-3' |
| <b>mv36</b> | 5'-<br>CCGCAGTCACAATTACTAAGCAGA<br>ATCTGAGCC-3' | <b>mv36_L</b> | 5'-<br>AAGTTGGGCGGTTGGGTGGCTCAGATTCTGCTTAG<br>TAATTGTGACTGCGG-3' |
| <b>mv37</b> | 5'-<br>CCGCAGTCACAATTACTCAGCAGA<br>ATCTGAGCC-3' | <b>mv37_L</b> | 5'-<br>AAGTTGGGCGGTTGGGTGGCTCAGATTCTGCTGAG<br>TAATTGTGACTGCGG-3' |
| <b>mv38</b> | 5'-<br>CCGCAGTCACAATTACTTAGCAGA<br>ATCTGAGCC-3' | <b>mv38_L</b> | 5'-<br>AAGTTGGGCGGTTGGGTGGCTCAGATTCTGCTAAG<br>TAATTGTGACTGCGG-3' |
| <b>mv39</b> | 5'-<br>CCGCAGTCACAATTTCTCAGCAGA<br>ATCTGAGCC-3' | <b>mv39_L</b> | 5'-<br>AAGTTGGGCGGTTGGGTGGCTCAGATTCTGCTGAG<br>AAATTGTGACTGCGG-3' |
| <b>mv40</b> | 5'-<br>CCGCAGTCACAATCACTCAGGAG<br>AATCTGAGCC-3' | <b>mv40_L</b> | 5'-<br>AAGTTGGGCGGTTGGGTGGCTCAGATTCTCCTGAG<br>TGATTGTGACTGCGG-3' |
| <b>mv41</b> | 5'-<br>CCGCAGTCACAATGACACAGGAG<br>AATCTGAGCC-3' | <b>mv41_L</b> | 5'-<br>AAGTTGGGCGGTTGGGTGGCTCAGATTCTCCTGTG<br>TCATTGTGACTGCGG-3' |
| <b>mv42</b> | 5'-<br>CCGCAGTCACAATGACCCAGGAG<br>AATCTGAGCC-3' | <b>mv42_L</b> | 5'-<br>AAGTTGGGCGGTTGGGTGGCTCAGATTCTCCTGGG<br>TCATTGTGACTGCGG-3' |
| <b>mv43</b> | 5'-<br>CCGCAGTCACAATGACTAAGTAG<br>AATCTGAGCC-3' | <b>mv43_L</b> | 5'-<br>AAGTTGGGCGGTTGGGTGGCTCAGATTCTACTTAG<br>TCATTGTGACTGCGG-3' |
| <b>mv44</b> | 5'-<br>CCGCAGTCACAATGACTAAGGAG<br>AATCTGAGCC-3' | <b>mv44_L</b> | 5'-<br>AAGTTGGGCGGTTGGGTGGCTCAGATTCTCCTTAG<br>TCATTGTGACTGCGG-3' |
| <b>mv45</b> | 5'-<br>CCGCAGTCACAATGACTCAGTAG<br>AATCTGAGCC-3' | <b>mv45_L</b> | 5'-<br>AAGTTGGGCGGTTGGGTGGCTCAGATTCTACTGAG<br>TCATTGTGACTGCGG-3' |
| <b>mv46</b> | 5'-<br>CCGCAGTCACAATGACTCAGGAG<br>AATCTGAGCC-3' | <b>mv46_L</b> | 5'-<br>AAGTTGGGCGGTTGGGTGGCTCAGATTCTCCTGAG<br>TCATTGTGACTGCGG-3' |
| <b>mv47</b> | 5'-<br>CCGCAGTCACAATTACTCAGGAG<br>AATCTGAGCC-3' | <b>mv47_L</b> | 5'-<br>AAGTTGGGCGGTTGGGTGGCTCAGATTCTCCTGAG<br>TAATTGTGACTGCGG-3' |
| <b>mv48</b> | 5'-<br>CCGCAGTCACACTTACTCAGCAGA<br>ATCTGAGCC-3' | <b>mv48_L</b> | 5'-<br>AAGTTGGGCGGTTGGGTGGCTCAGATTCTGCTGAG<br>TAAGTGTGACTGCGG-3' |
| <b>mv49</b> | 5'-<br>CCGCAGTCACATTTACTCAGCAGA<br>ATCTGAGCC-3' | <b>mv49_L</b> | 5'-<br>AAGTTGGGCGGTTGGGTGGCTCAGATTCTGCTGAG<br>TAAATGTGACTGCGG-3' |
| <b>mv50</b> | 5'-<br>CCGCAGTCACAGTGACTCAGGCG<br>AATCTGAGCC-3' | <b>mv50_L</b> | 5'-<br>AAGTTGGGCGGTTGGGTGGCTCAGATTGCCTGAG<br>TCACTGTGACTGCGG-3'  |



|             |                                                 |               |                                                                   |
|-------------|-------------------------------------------------|---------------|-------------------------------------------------------------------|
| <b>mv51</b> | 5'-<br>CCGCAGTCACAGTGACTCAGGTG<br>AATCTGAGCC-3' | <b>mv51_L</b> | 5'-<br>AAGTTGGGCGGTTGGGTGGCTCAGATTCACCTGAG<br>TCACTGTGACTGCGG-3'  |
| <b>mv52</b> | 5'-<br>CCGCAGTCACAGTGACTCAGGGG<br>AATCTGAGCC-3' | <b>mv52_L</b> | 5'-<br>AAGTTGGGCGGTTGGGTGGCTCAGATTCCTGAG<br>TCACTGTGACTGCGG-3'    |
| <b>mv53</b> | 5'-<br>CCGCAGTCACAGTGACTCAGTCG<br>AATCTGAGCC-3' | <b>mv53_L</b> | 5'-<br>AAGTTGGGCGGTTGGGTGGCTCAGATTCGACTGAG<br>TCACTGTGACTGCGG-3'  |
| <b>mv54</b> | 5'-<br>CCGCAGTCACAGTGACTCAGTTG<br>AATCTGAGCC-3' | <b>mv54_L</b> | 5'-<br>AAGTTGGGCGGTTGGGTGGCTCAGATTCAACTGAG<br>TCACTGTGACTGCGG-3'  |
| <b>mv55</b> | 5'-<br>CCGCAGTCACAGTGACTCAGTGG<br>AATCTGAGCC-3' | <b>mv55_L</b> | 5'-<br>AAGTTGGGCGGTTGGGTGGCTCAGATTCCTGAG<br>TCACTGTGACTGCGG-3'    |
| <b>mv56</b> | 5'-<br>CCGCAGTCACAGTGACTCATCCGA<br>ATCTGAGCC-3' | <b>mv56_L</b> | 5'-<br>AAGTTGGGCGGTTGGGTGGCTCAGATTCGGATGAG<br>TCACTGTGACTGCGG-3'  |
| <b>mv57</b> | 5'-<br>CCGCAGTCACAGTGACTCATCTGA<br>ATCTGAGCC-3' | <b>mv57_L</b> | 5'-<br>AAGTTGGGCGGTTGGGTGGCTCAGATTCAGATGAG<br>TCACTGTGACTGCGG-3'  |
| <b>mv58</b> | 5'-<br>CCGCAGTCACAGTGACTCATCGG<br>AATCTGAGCC-3' | <b>mv58_L</b> | 5'-<br>AAGTTGGGCGGTTGGGTGGCTCAGATTCAGATGAG<br>TCACTGTGACTGCGG-3'  |
| <b>mv59</b> | 5'-<br>CCGCAGTCACAATGACTCATCAGA<br>ATCTGAGCC-3' | <b>mv59_L</b> | 5'-<br>AAGTTGGGCGGTTGGGTGGCTCAGATTCATGATGAG<br>TCACTGTGACTGCGG-3' |
| <b>mv60</b> | 5'-<br>CCGCAGTCACAGTGACTCAGAGG<br>AATCTGAGCC-3' | <b>mv60_L</b> | 5'-<br>AAGTTGGGCGGTTGGGTGGCTCAGATTCCTCTGAG<br>TCACTGTGACTGCGG-3'  |
| <b>mv61</b> | 5'-<br>CCGCAGTCACAGTGACTCAGACG<br>AATCTGAGCC-3' | <b>mv61_L</b> | 5'-<br>AAGTTGGGCGGTTGGGTGGCTCAGATTCGTCTGAG<br>TCACTGTGACTGCGG-3'  |
| <b>mv62</b> | 5'-<br>CCGCAGTCACAGTGACTCAGATG<br>AATCTGAGCC-3' | <b>mv62_L</b> | 5'-<br>AAGTTGGGCGGTTGGGTGGCTCAGATTCATCTGAG<br>TCACTGTGACTGCGG-3'  |
| <b>mv63</b> | 5'-<br>CCGCAGTCACAGTGACTCAACGG<br>AATCTGAGCC-3' | <b>mv63_L</b> | 5'-<br>AAGTTGGGCGGTTGGGTGGCTCAGATTCAGTTGAG<br>TCACTGTGACTGCGG-3'  |
| <b>mv64</b> | 5'-<br>CCGCAGTCACAGTGACTCAACCG<br>AATCTGAGCC-3' | <b>mv64_L</b> | 5'-<br>AAGTTGGGCGGTTGGGTGGCTCAGATTCAGTTGAG<br>TCACTGTGACTGCGG-3'  |
| <b>mv65</b> | 5'-<br>CCGCAGTCACAGTGACTCAACTG<br>AATCTGAGCC-3' | <b>mv65_L</b> | 5'-<br>AAGTTGGGCGGTTGGGTGGCTCAGATTCAGTTGAG<br>TCACTGTGACTGCGG-3'  |
| <b>mv66</b> | 5'-<br>CCGCAGTCACAGTGACTCACCGG<br>AATCTGAGCC-3' | <b>mv66_L</b> | 5'-<br>AAGTTGGGCGGTTGGGTGGCTCAGATTCAGTTGAG<br>TCACTGTGACTGCGG-3'  |
| <b>mv67</b> | 5'-<br>CCGCAGTCACAGTGACTCACCCG<br>AATCTGAGCC-3' | <b>mv67_L</b> | 5'-<br>AAGTTGGGCGGTTGGGTGGCTCAGATTCAGTTGAG<br>TCACTGTGACTGCGG-3'  |

|             |                                                     |               |                                                                  |
|-------------|-----------------------------------------------------|---------------|------------------------------------------------------------------|
| <b>mv68</b> | 5'-<br>CCGCAGTCACAGTGA<br>CTCACCTGA<br>ATCTGAGCC-3' | <b>mv68_L</b> | 5'-<br>AAGTTGGGCGGTTGGGTGGCTCAGATTCAGGTGAG<br>TCACTGTGACTGCGG-3' |
| <b>mv69</b> | 5'-<br>CCGCAGTCACAGTGACCCCGCAG<br>AATCTGAGCC-3'     | <b>mv69_L</b> | 5'-<br>AAGTTGGGCGGTTGGGTGGCTCAGATTCTGCGGGG<br>TCACTGTGACTGCGG-3' |
| <b>mv70</b> | 5'-<br>CCGCAGTCACAGTGACGGGGCAG<br>AATCTGAGCC-3'     | <b>mv70_L</b> | 5'-<br>AAGTTGGGCGGTTGGGTGGCTCAGATTCTGCCCG<br>TCACTGTGACTGCGG-3'  |
| <b>mv71</b> | 5'-<br>CCGCAGTCACAGTGA<br>CTTTGCAG<br>AATCTGAGCC-3' | <b>mv71_L</b> | 5'-<br>AAGTTGGGCGGTTGGGTGGCTCAGATTCTGCAAAG<br>TCACTGTGACTGCGG-3' |
| <b>mv72</b> | 5'-<br>CCGCAGTCACAGTGACACTGCAG<br>AATCTGAGCC-3'     | <b>mv72_L</b> | 5'-<br>AAGTTGGGCGGTTGGGTGGCTCAGATTCTGCAGTG<br>TCACTGTGACTGCGG-3' |
| <b>mv73</b> | 5'-<br>CCGCAGTCACAGTGACCTAGCAG<br>AATCTGAGCC-3'     | <b>mv73_L</b> | 5'-<br>AAGTTGGGCGGTTGGGTGGCTCAGATTCTGCTAGG<br>TCACTGTGACTGCGG-3' |
| <b>mv74</b> | 5'-<br>CCGCAGTCACAGTGACCGAGCAG<br>AATCTGAGCC-3'     | <b>mv74_L</b> | 5'-<br>AAGTTGGGCGGTTGGGTGGCTCAGATTCTGCTCGG<br>TCACTGTGACTGCGG-3' |
| <b>mv75</b> | 5'-<br>CCGCAGTCACAGTGACCCTGCAG<br>AATCTGAGCC-3'     | <b>mv75_L</b> | 5'-<br>AAGTTGGGCGGTTGGGTGGCTCAGATTCTGCAGGG<br>TCACTGTGACTGCGG-3' |
| <b>mv76</b> | 5'-<br>CCGCAGTCACAGTGACGGAGCAG<br>AATCTGAGCC-3'     | <b>mv76_L</b> | 5'-<br>AAGTTGGGCGGTTGGGTGGCTCAGATTCTGCTCCG<br>TCACTGTGACTGCGG-3' |
| <b>mv77</b> | 5'-<br>CCGCAGTCACAGTGACGAAGCAG<br>AATCTGAGCC-3'     | <b>mv77_L</b> | 5'-<br>AAGTTGGGCGGTTGGGTGGCTCAGATTCTGCTTCG<br>TCACTGTGACTGCGG-3' |
| <b>mv78</b> | 5'-<br>CCGCAGTCACAGTGACGTAGCAG<br>AATCTGAGCC-3'     | <b>mv78_L</b> | 5'-<br>AAGTTGGGCGGTTGGGTGGCTCAGATTCTGCTACG<br>TCACTGTGACTGCGG-3' |
| <b>mv79</b> | 5'-<br>CCGCAGTCACAGTGACGCCGCAG<br>AATCTGAGCC-3'     | <b>mv79_L</b> | 5'-<br>AAGTTGGGCGGTTGGGTGGCTCAGATTCTGCGGCC<br>TCACTGTGACTGCGG-3' |
| <b>mv80</b> | 5'-<br>CCGCAGTCACAGTGACGCGGCAG<br>AATCTGAGCC-3'     | <b>mv80_L</b> | 5'-<br>AAGTTGGGCGGTTGGGTGGCTCAGATTCTGCCCG<br>TCACTGTGACTGCGG-3'  |
| <b>mv81</b> | 5'-<br>CCGCAGTCACAGTGACGCTGCAG<br>AATCTGAGCC-3'     | <b>mv81_L</b> | 5'-<br>AAGTTGGGCGGTTGGGTGGCTCAGATTCTGCAGCG<br>TCACTGTGACTGCGG-3' |
| <b>mv82</b> | 5'-<br>CCGCAGTCACAGTGA<br>CTACGCAG<br>AATCTGAGCC-3' | <b>mv82_L</b> | 5'-<br>AAGTTGGGCGGTTGGGTGGCTCAGATTCTGCGTAG<br>TCACTGTGACTGCGG-3' |
| <b>mv83</b> | 5'-<br>CCGCAGTCACAGTGA<br>CTATGCAG<br>AATCTGAGCC-3' | <b>mv83_L</b> | 5'-<br>AAGTTGGGCGGTTGGGTGGCTCAGATTCTGCATAG<br>TCACTGTGACTGCGG-3' |
| <b>mv84</b> | 5'-<br>CCGCAGTCACAGTGA<br>CTGCGCAG<br>AATCTGAGCC-3' | <b>mv84_L</b> | 5'-<br>AAGTTGGGCGGTTGGGTGGCTCAGATTCTGCGCAG<br>TCACTGTGACTGCGG-3' |

|              |                                                 |                |                                                                   |
|--------------|-------------------------------------------------|----------------|-------------------------------------------------------------------|
| <b>mv85</b>  | 5'-<br>CCGCAGTCACAGTGACTGGGCAG<br>AATCTGAGCC-3' | <b>mv85_L</b>  | 5'-<br>AAGTTGGGCGGTTGGGTGGCTCAGATTCTGCCAG<br>TCACTGTGACTGCGG-3'   |
| <b>mv86</b>  | 5'-<br>CCGCAGTCACAGTGACTGTGCAG<br>AATCTGAGCC-3' | <b>mv86_L</b>  | 5'-<br>AAGTTGGGCGGTTGGGTGGCTCAGATTCTGCACAG<br>TCACTGTGACTGCGG-3'  |
| <b>mv87</b>  | 5'-<br>CCGCAGTCACAGTGACTTCGCAG<br>AATCTGAGCC-3' | <b>mv87_L</b>  | 5'-<br>AAGTTGGGCGGTTGGGTGGCTCAGATTCTGCGAAG<br>TCACTGTGACTGCGG-3'  |
| <b>mv88</b>  | 5'-<br>CCGCAGTCACAGTGACTTGGCAG<br>AATCTGAGCC-3' | <b>mv88_L</b>  | 5'-<br>AAGTTGGGCGGTTGGGTGGCTCAGATTCTGCCAAG<br>TCACTGTGACTGCGG-3'  |
| <b>mv89</b>  | 5'-<br>CCGCAGTCACAATGATTCAGCAG<br>AATCTGAGCC-3' | <b>mv89_L</b>  | 5'-<br>AAGTTGGGCGGTTGGGTGGCTCAGATTCTGCTGAA<br>TCATTGTGACTGCGG-3'  |
| <b>mv90</b>  | 5'-<br>CCGCAGTCACAATGAGTCAGCAG<br>AATCTGAGCC-3' | <b>mv90_L</b>  | 5'-<br>AAGTTGGGCGGTTGGGTGGCTCAGATTCTGCTGAC<br>TCATTGTGACTGCGG-3'  |
| <b>mv91</b>  | 5'-<br>CCGCAGTCACAATGAATCAGCAG<br>AATCTGAGCC-3' | <b>mv91_L</b>  | 5'-<br>AAGTTGGGCGGTTGGGTGGCTCAGATTCTGCTGAT<br>TCATTGTGACTGCGG-3'  |
| <b>mv92</b>  | 5'-<br>CCGCAGTCACAATGACTCAGCGG<br>AATCTGAGCC-3' | <b>mv92_L</b>  | 5'-<br>AAGTTGGGCGGTTGGGTGGCTCAGATTCCGCTGAG<br>TCATTGTGACTGCGG-3'  |
| <b>mv93</b>  | 5'-<br>CCGCAGTCACAATGACTCAGCCG<br>AATCTGAGCC-3' | <b>mv93_L</b>  | 5'-<br>AAGTTGGGCGGTTGGGTGGCTCAGATTCCGCTGAG<br>TCATTGTGACTGCGG-3'  |
| <b>mv94</b>  | 5'-<br>CCGCAGTCACAATGACTCAGCTG<br>AATCTGAGCC-3' | <b>mv94_L</b>  | 5'-<br>AAGTTGGGCGGTTGGGTGGCTCAGATTCCAGCTGAG<br>TCATTGTGACTGCGG-3' |
| <b>mv95</b>  | 5'-<br>CCGCAGTCACAATGATATAGCAG<br>AATCTGAGCC-3' | <b>mv95_L</b>  | 5'-<br>AAGTTGGGCGGTTGGGTGGCTCAGATTCTGCTATA<br>TCATTGTGACTGCGG-3'  |
| <b>mv96</b>  | 5'-<br>CCGCAGTCACAATGAGATAGCAG<br>AATCTGAGCC-3' | <b>mv96_L</b>  | 5'-<br>AAGTTGGGCGGTTGGGTGGCTCAGATTCTGCTATC<br>TCATTGTGACTGCGG-3'  |
| <b>mv97</b>  | 5'-<br>CCGCAGTCACAATGAAATAGCAG<br>AATCTGAGCC-3' | <b>mv97_L</b>  | 5'-<br>AAGTTGGGCGGTTGGGTGGCTCAGATTCTGCTATTT<br>CATTGTGACTGCGG-3'  |
| <b>mv98</b>  | 5'-<br>CCGCAGTCACAATGACATAGCGG<br>AATCTGAGCC-3' | <b>mv98_L</b>  | 5'-<br>AAGTTGGGCGGTTGGGTGGCTCAGATTCCGCTATG<br>TCATTGTGACTGCGG-3'  |
| <b>mv99</b>  | 5'-<br>CCGCAGTCACAATGACATAGCCG<br>AATCTGAGCC-3' | <b>mv99_L</b>  | 5'-<br>AAGTTGGGCGGTTGGGTGGCTCAGATTCCGCTATG<br>TCATTGTGACTGCGG-3'  |
| <b>mv100</b> | 5'-<br>CCGCAGTCACAATGACATAGCTG<br>AATCTGAGCC-3' | <b>mv100_L</b> | 5'-<br>AAGTTGGGCGGTTGGGTGGCTCAGATTCCAGCTATG<br>TCATTGTGACTGCGG-3' |
| <b>mv101</b> | 5'-<br>CCGCAGTCACAATGATTCAGTAG<br>AATCTGAGCC-3' | <b>mv101_L</b> | 5'-<br>AAGTTGGGCGGTTGGGTGGCTCAGATTCTACTGAA<br>TCATTGTGACTGCGG-3'  |

|              |                                                 |                |                                                                  |
|--------------|-------------------------------------------------|----------------|------------------------------------------------------------------|
| <b>mv102</b> | 5'-<br>CCGCAGTCACAATGAGTCAGTAG<br>AATCTGAGCC    | <b>mv102_L</b> | 5'-<br>AAGTTGGGCGGTTGGGTGGCTCAGATTCTACTGAC<br>TCATTGTGACTGCGG-3' |
| <b>mv103</b> | 5'-<br>CCGCAGTCACAATGAATCAGTAG<br>AATCTGAGCC-3' | <b>mv103_L</b> | 5'-<br>AAGTTGGGCGGTTGGGTGGCTCAGATTCTACTGAT<br>TCATTGTGACTGCGG-3' |
| <b>mv104</b> | 5'-<br>CCGCAGTCACAATGACTCAGTGG<br>AATCTGAGCC-3' | <b>mv104_L</b> | 5'-<br>AAGTTGGGCGGTTGGGTGGCTCAGATTCCACTGAG<br>TCATTGTGACTGCGG-3' |
| <b>mv105</b> | 5'-<br>CCGCAGTCACAATGACTCAGTCG<br>AATCTGAGCC-3' | <b>mv105_L</b> | 5'-<br>AAGTTGGGCGGTTGGGTGGCTCAGATTGACTGAG<br>TCATTGTGACTGCGG-3'  |
| <b>mv106</b> | 5'-<br>CCGCAGTCACAATGACTCAGTTGA<br>ATCTGAGCC-3' | <b>mv106_L</b> | 5'-<br>AAGTTGGGCGGTTGGGTGGCTCAGATTCAACTGAG<br>TCATTGTGACTGCGG-3' |
| <b>mv107</b> | 5'-<br>CCGCAGTCACAATGAATAAGCGG<br>AATCTGAGCC-3' | <b>mv107_L</b> | 5'-<br>AAGTTGGGCGGTTGGGTGGCTCAGATTCCGCTTAT<br>TCATTGTGACTGCGG-3' |
| <b>mv108</b> | 5'-<br>CCGCAGTCACAATGATTAAGCCG<br>AATCTGAGCC-3' | <b>mv108_L</b> | 5'-<br>AAGTTGGGCGGTTGGGTGGCTCAGATTCCGCTTAA<br>TCATTGTGACTGCGG-3' |
| <b>mv109</b> | 5'-<br>CCGCAGTCACAATGAGTAAGCTG<br>AATCTGAGCC-3' | <b>mv109_L</b> | 5'-<br>AAGTTGGGCGGTTGGGTGGCTCAGATTGAGCTTAC<br>TCATTGTGACTGCGG-3' |
| <b>mv110</b> | 5'-<br>CCGCAGTCACAATGAGACGGCGG<br>AATCTGAGCC-3' | <b>mv110_L</b> | 5'-<br>AAGTTGGGCGGTTGGGTGGCTCAGATTCCGCCGTC<br>TCATTGTGACTGCGG-3' |
| <b>mv111</b> | 5'-<br>CCGCAGTCACAATGAAACGGCCG<br>AATCTGAGCC-3' | <b>mv111_L</b> | 5'-<br>AAGTTGGGCGGTTGGGTGGCTCAGATTCCGCCGTT<br>TCATTGTGACTGCGG-3' |
| <b>mv112</b> | 5'-<br>CCGCAGTCACAATGATACGGCTG<br>AATCTGAGCC-3' | <b>mv112_L</b> | 5'-<br>AAGTTGGGCGGTTGGGTGGCTCAGATTGAGCCGTA<br>TCATTGTGACTGCGG-3' |
| <b>mv113</b> | 5'-<br>CCGCAGTCACAATGATTAAGGGG<br>AATCTGAGCC-3' | <b>mv113_L</b> | 5'-<br>AAGTTGGGCGGTTGGGTGGCTCAGATTCCCCTTAA<br>TCATTGTGACTGCGG-3' |
| <b>mv114</b> | 5'-<br>CCGCAGTCACAATGAGTAAGGCG<br>AATCTGAGCC-3' | <b>mv114_L</b> | 5'-<br>AAGTTGGGCGGTTGGGTGGCTCAGATTGCGCTTAC<br>TCATTGTGACTGCGG-3' |
| <b>mv115</b> | 5'-<br>CCGCAGTCACAATGAATAAGGTG<br>AATCTGAGCC-3' | <b>mv115_L</b> | 5'-<br>AAGTTGGGCGGTTGGGTGGCTCAGATTCACCTTATT<br>CATTGTGACTGCGG-3' |
| <b>mv116</b> | 5'-<br>CCGCAGTCACAATGATGCAGCGG<br>AATCTGAGCC-3' | <b>mv116_L</b> | 5'-<br>AAGTTGGGCGGTTGGGTGGCTCAGATTCCGCTGCA<br>TCATTGTGACTGCGG-3' |
| <b>mv117</b> | 5'-<br>CCGCAGTCACACTGAGGCAGCCG<br>AATCTGAGCC-3' | <b>mv117_L</b> | 5'-<br>AAGTTGGGCGGTTGGGTGGCTCAGATTCCGCTGCC<br>TCAGTGTGACTGCGG-3' |
| <b>mv118</b> | 5'-<br>CCGCAGTCACAGTACTCAGTAG<br>AATCTGAGCC-3'  | <b>mv118_L</b> | 5'-<br>AAGTTGGGCGGTTGGGTGGCTCAGATTCTACTGAG<br>TCATTGTGACTGCGG-3' |

|               |                                                 |                |                                                                  |
|---------------|-------------------------------------------------|----------------|------------------------------------------------------------------|
| <b>mv119</b>  | 5'-<br>CCGCAGTCACACTGACTCAGTAG<br>AATCTGAGCC-3' | <b>mv119_L</b> | 5'-<br>AAGTTGGGCGGTTGGGTGGCTCAGATTCTACTGAG<br>TCAGTGTGACTGCGG-3' |
| <b>mv120</b>  | 5'-<br>CCGCAGTCACATTGACTCAGTAGA<br>ATCTGAGCC-3' | <b>mv120_L</b> | 5'-<br>AAGTTGGGCGGTTGGGTGGCTCAGATTCTACTGAG<br>TCAATGTGACTGCGG-3' |
| <b>mv121</b>  | 5'-<br>CCGCAGTCACAGTGACATAGCAG<br>AATCTGAGCC-3' | <b>mv121_L</b> | 5'-<br>AAGTTGGGCGGTTGGGTGGCTCAGATTCTGCTATG<br>TCACTGTGACTGCGG-3' |
| <b>mv122</b>  | 5'-<br>CCGCAGTCACACTGACATAGCAG<br>AATCTGAGCC-3' | <b>mv122_L</b> | 5'-<br>AAGTTGGGCGGTTGGGTGGCTCAGATTCTGCTATG<br>TCAGTGTGACTGCGG-3' |
| <b>mv123</b>  | 5'-<br>CCGCAGTCACATTGACATAGCAG<br>AATCTGAGCC-3' | <b>mv123_L</b> | 5'-<br>AAGTTGGGCGGTTGGGTGGCTCAGATTCTGCTATG<br>TCAATGTGACTGCGG-3' |
| <b>mv124</b>  | 5'-<br>CCGCAGTCACATTGAAGCAGCTG<br>AATCTGAGCC-3' | <b>mv124_L</b> | 5'-<br>AAGTTGGGCGGTTGGGTGGCTCAGATTCAGCTGCT<br>TCAATGTGACTGCGG-3' |
| <b>mv125</b>  | 5'-<br>CCGCAGTCACAATGATTGAGCGG<br>AATCTGAGCC-3' | <b>mv125_L</b> | 5'-<br>AAGTTGGGCGGTTGGGTGGCTCAGATTCGGCTCAA<br>TCATTGTGACTGCGG-3' |
| <b>mv126</b>  | 5'-<br>CCGCAGTCACACTGAGTGAGCCG<br>AATCTGAGCC-3' | <b>mv126_L</b> | 5'-<br>AAGTTGGGCGGTTGGGTGGCTCAGATTCGGCTCAC<br>TCAGTGTGACTGCGG-3' |
| <b>mv127</b>  | 5'-<br>CCGCAGTCACATTGAATGAGCTG<br>AATCTGAGCC-3' | <b>mv127_L</b> | 5'-<br>AAGTTGGGCGGTTGGGTGGCTCAGATTCAGCTCAT<br>TCAATGTGACTGCGG-3' |
| <b>mv128</b>  | 5'-<br>CCGCAGTCACAATGATTAAGTGG<br>AATCTGAGCC-3' | <b>mv128_L</b> | 5'-<br>AAGTTGGGCGGTTGGGTGGCTCAGATTCCAATTAA<br>TCATTGTGACTGCGG-3' |
| <b>mv129</b>  | 5'-<br>CCGCAGTCACACTGAGTAAGTCG<br>AATCTGAGCC-3' | <b>mv129_L</b> | 5'-<br>AAGTTGGGCGGTTGGGTGGCTCAGATTCGACTTAC<br>TCAGTGTGACTGCGG-3' |
| <b>mv130</b>  | 5'-<br>CCGCAGTCACATTGAATAAGTTGA<br>ATCTGAGCC-3' | <b>mv130_L</b> | 5'-<br>AAGTTGGGCGGTTGGGTGGCTCAGATTCAACTTAT<br>TCAATGTGACTGCGG-3' |
| <b>Primer</b> | 5'-ACCCAACCGCCCAACTT-Biotin-<br>3'              |                |                                                                  |

Table S5.

| NRF2-MAFG  |      |                  |                  |      |                              |                              |            |      |                  |                  |      |                              |                              |      |
|------------|------|------------------|------------------|------|------------------------------|------------------------------|------------|------|------------------|------------------|------|------------------------------|------------------------------|------|
| Nucleotide | Atom | Residue/<br>NRF2 | Residue/<br>MAFG | Atom | Distance <sup>a</sup><br>(Å) | Distance <sup>b</sup><br>(Å) | Nucleotide | Atom | Residue/<br>NRF2 | Residue/<br>MAFG | Atom | Distance <sup>a</sup><br>(Å) | Distance <sup>b</sup><br>(Å) |      |
| 1G         | O6   | R57              |                  | NH2  | 2,76                         | 2,96                         | 11C        | N4   | R57              |                  | NH2  | 3,87                         | 4,30                         |      |
|            | N7   | R57              |                  | NH1  | 3,07                         | 2,89                         |            |      |                  |                  |      |                              |                              |      |
| 2T         | O4   | N61              |                  | ND2  | 2,8                          | 2,76                         | 10A        | N6   | R57              |                  | NH2  | 3,58                         | 3,36                         |      |
|            | C7   | A64              |                  | CB   | 4,20                         | 3,96                         |            |      | N6               | N61              |      | ND2                          | 4,13                         | 4,16 |
|            | C7   | A65              |                  | CB   | 4,54                         | 4,23                         |            |      |                  |                  |      |                              |                              |      |
| 3G         |      |                  |                  |      |                              |                              | 9C         | N4   | N61              |                  | OD1  | 2,97                         | 3,12                         |      |
| 4A         |      |                  |                  |      |                              |                              | 8T         | C7   | A65              |                  | CB   | 3,88                         | 3,40                         |      |
| 5C         |      |                  |                  |      |                              |                              | 7G         |      |                  |                  |      |                              |                              |      |
| 6T         |      |                  |                  |      |                              |                              | 6A         |      |                  |                  |      |                              |                              |      |
| 7C         | N4   |                  | N61              | ND2  | 3,64                         | 4,04                         | 5G         |      |                  |                  |      |                              |                              |      |
| 8A         | N6   |                  | N61              | ND2  | 3,56                         | 3,90                         | 4T         | O4   |                  | N61              | ND2  | 3,03                         | 3,04                         |      |
| 9G         | O6   | R57              | NH2              | 2,89 | 3,19                         | C7                           |            |      | C68              | SG               | 4,00 | 3,87                         |                              |      |
|            |      |                  |                  |      |                              | C7                           |            |      | Y64              | CB               | 4,26 | 3,7                          |                              |      |
| 10C        |      |                  |                  |      |                              | 3C                           | N4         |      | N61              | OD1              | 2,86 | 2,98                         |                              |      |
| 11A        |      |                  |                  |      |                              |                              | 2G         | N7   |                  | R57              | NH1  | 3,03                         | 2,95                         |      |
|            |      |                  |                  |      |                              |                              |            | O6   |                  | R57              | NH2  | 2,78                         | 2,85                         |      |

  

| MAFG-NRF2  |      |                  |                  |      |                              |                              |            |      |                  |                  |      |                              |                              |      |
|------------|------|------------------|------------------|------|------------------------------|------------------------------|------------|------|------------------|------------------|------|------------------------------|------------------------------|------|
| Nucleotide | Atom | Residue/M<br>AFG | Residue/<br>NRF2 | Atom | Distance <sup>a</sup><br>(Å) | Distance <sup>b</sup><br>(Å) | Nucleotide | Atom | Residue/<br>MAFG | Residue/<br>NRF2 | Atom | Distance <sup>a</sup><br>(Å) | Distance <sup>b</sup><br>(Å) |      |
| 1G         | O6   | R57              |                  | NH2  | 2,71                         | 2,63                         | 11C        | N4   | R57              |                  | NH2  | 3,78                         | 3,59                         |      |
|            | N7   | R57              |                  | NH1  | 4,26                         | 4,07                         |            |      |                  |                  |      |                              |                              |      |
| 2T         | O4   | N61              |                  | ND2  | 2,92                         | 2,78                         | 10A        | N6   | R57              |                  | NH2  | 4,07                         | 3,10                         |      |
|            | C7   | Y64              |                  | CB   | 3,66                         | 3,50                         |            |      | N6               | N61              |      | ND2                          | 3,98                         | 3,30 |
|            | C6   | C68              |                  | SG   | 4,00                         | 3,73                         |            |      |                  |                  |      |                              |                              |      |
| 3G         |      |                  |                  |      |                              |                              | 9C         | N4   | N61              |                  | OD1  | 2,99                         | 3,02                         |      |
| 4A         |      |                  |                  |      |                              |                              | 8T         | C7   | A65              |                  | CB   | 3,64                         | 3,82                         |      |
|            |      |                  |                  |      |                              |                              |            | C7   | R62              |                  | CA   | 3,88                         | 4,03                         |      |
| 5C         |      |                  |                  |      |                              |                              | 7G         | N7   | R69              |                  | NH1  | 3,26                         | 4,00                         |      |
| 6T         | C7   |                  | A65              | CB   | 3,89                         | 4,00                         | 6A         |      |                  |                  |      |                              |                              |      |
|            | C7   |                  | K62              | CA   | 4,09                         | 3,98                         |            |      |                  |                  |      |                              |                              |      |
| 7C         | N4   |                  | N61              | OD1  | 3,03                         | 3,19                         | 5G         |      |                  |                  |      |                              |                              |      |
| 8A         | N6   |                  | N61              | ND2  | 3,31                         | 3,44                         | 4T         | O4   |                  | N61              | ND2  | 2,92                         | 3,04                         |      |
| 9G         | O6   | R57              | NH2              | 3,24 | 2,78                         | C7                           |            |      | C68              | CB               | 4,00 | 4,40                         |                              |      |
|            |      |                  |                  |      |                              | C7                           |            |      | A64              | CB               | 4,32 | 4,14                         |                              |      |
| 10C        |      |                  |                  |      |                              | 3C                           | N4         |      | N61              | ND2              | 3,58 | 3,43                         |                              |      |
| 11A        |      |                  |                  |      |                              |                              | 2G         | O6   |                  | R57              | NH1  | 3,41                         | 2,84                         |      |
|            |      |                  |                  |      |                              |                              |            | O6   |                  | R57              | NH2  | 2,89                         | 2,98                         |      |
|            |      |                  |                  |      |                              |                              |            | N7   |                  | R57              | NH1  | 2,97                         | 3,53                         |      |

Table S6.

| 1 | 2 | 3 | 4 | 5 | 6 | 7 | 8 | 9 | 10 | 11 | Name | Measured binding |
|---|---|---|---|---|---|---|---|---|----|----|------|------------------|
| A | T | G | A | C | T | C | A | G | C  | A  | 1A   | 1.21             |
| C | T | G | A | C | T | C | A | G | C  | A  | 1C   | 1.10             |
| T | T | G | A | C | T | C | A | G | C  | A  | 1T   | 0.77             |
| G | A | G | A | C | T | C | A | G | C  | A  | 2A   | 0.00             |
| G | C | G | A | C | T | C | A | G | C  | A  | 2C   | 0.15             |
| G | G | G | A | C | T | C | A | G | C  | A  | 2G   | 0.00             |
| G | T | A | A | C | T | C | A | G | C  | A  | 3A   | 0.01             |
| G | T | C | A | C | T | C | A | G | C  | A  | 3C   | 0.00             |
| G | T | T | A | C | T | C | A | G | C  | A  | 3T   | 0.55             |
| G | T | G | C | C | T | C | A | G | C  | A  | 4C   | 0.01             |
| G | T | G | G | C | T | C | A | G | C  | A  | 4G   | 0.05             |
| G | T | G | T | C | T | C | A | G | C  | A  | 4T   | 0.01             |
| G | T | G | A | A | T | C | A | G | C  | A  | 5A   | 0.82             |
| G | T | G | A | G | T | C | A | G | C  | A  | 5G   | 0.94             |
| G | T | G | A | T | T | C | A | G | C  | A  | 5T   | 1.24             |
| G | T | G | A | C | A | C | A | G | C  | A  | 6A   | 0.94             |
| G | T | G | A | C | C | C | A | G | C  | A  | 6C   | 0.46             |
| G | T | G | A | C | G | C | A | G | C  | A  | 6G   | 1.14             |
| G | T | G | A | C | T | A | A | G | C  | A  | 7A   | 1.27             |
| G | T | G | A | C | T | G | A | G | C  | A  | 7G   | 0.63             |
| G | T | G | A | C | T | T | A | G | C  | A  | 7T   | 0.98             |
| G | T | G | A | C | T | C | C | G | C  | A  | 8C   | 0.68             |
| G | T | G | A | C | T | C | G | G | C  | A  | 8G   | 0.88             |
| G | T | G | A | C | T | C | T | G | C  | A  | 8T   | 0.94             |
| G | T | G | A | C | T | C | A | A | C  | A  | 9A   | 0.84             |
| G | T | G | A | C | T | C | A | C | C  | A  | 9C   | 0.37             |
| G | T | G | A | C | T | C | A | T | C  | A  | 9T   | 1.10             |
| G | T | G | A | C | T | C | A | G | A  | A  | 10A  | 0.16             |
| G | T | G | A | C | T | C | A | G | G  | A  | 10G  | 0.54             |
| G | T | G | A | C | T | C | A | G | T  | A  | 10T  | 0.57             |
| G | T | G | A | C | T | C | A | G | C  | C  | 11C  | 0.78             |
| G | T | G | A | C | T | C | A | G | C  | G  | 11G  | 1.22             |
| G | T | G | A | C | T | C | A | G | C  | T  | 11T  | 0.83             |



Table S7.

| 1 | 2 | 3 | 4 | 5 | 6 | 7 | 8 | 9 | 10 | 11 | Name    | Measured binding |
|---|---|---|---|---|---|---|---|---|----|----|---------|------------------|
| A | G | G | A | C | T | C | A | G | C  | A  | 1A2G    | 0.01             |
| A | G | G | A | C | T | A | A | G | C  | A  | 1A2G7A  | 0.00             |
| A | T | C | A | C | A | C | A | G | C  | A  | 1A3C6A  | 0.00             |
| A | T | C | A | C | T | A | A | G | C  | A  | 1A3C7A  | 0.00             |
| A | T | C | A | C | T | C | A | G | C  | A  | 1A3C    | 0.00             |
| A | T | C | A | C | T | C | A | G | G  | A  | 1A3C10G | 0.00             |
| A | T | C | A | C | T | C | C | G | C  | A  | 1A3C8C  | 0.00             |
| A | T | G | A | C | A | A | A | G | C  | A  | 1A6A7A  | 0.61             |
| A | T | G | A | C | A | C | A | G | C  | A  | 1A6A    | 0.75             |
| A | T | G | A | C | A | C | A | G | G  | A  | 1A6A10G | 0.00             |
| A | T | G | A | C | A | C | C | G | C  | A  | 1A6A8C  | 0.20             |
| A | T | G | A | C | A | C | G | G | C  | A  | 1A6A8G  | 0.49             |
| A | T | G | A | C | A | G | A | G | C  | A  | 1A6A7G  | 0.36             |
| A | T | G | A | C | A | T | A | G | C  | A  | 1A6A7T  | 0.51             |
| A | T | G | A | C | C | A | A | G | C  | A  | 1A6C7A  | 0.27             |
| A | T | G | A | C | C | C | A | G | C  | A  | 1A6C    | 0.07             |
| A | T | G | A | C | C | C | A | G | G  | A  | 1A6C10G | 0.00             |
| A | T | G | A | C | C | C | G | G | C  | A  | 1A6C8G  | 0.02             |
| A | T | G | A | C | G | C | A | G | C  | A  | 1A6G    | 0.87             |
| A | T | G | A | C | T | A | A | G | C  | A  | 1A7A    | 1.07             |
| A | T | G | A | C | T | A | A | G | T  | A  | 1A7A10T | 0.03             |
| A | T | G | A | C | T | A | A | G | G  | A  | 1A7A10G | 0.04             |
| A | T | G | A | C | T | A | G | G | C  | A  | 1A7A8G  | 0.87             |
| A | T | G | A | C | T | C | A | G | C  | A  | 1A      | 1.35             |
| A | T | G | A | C | T | C | A | G | T  | A  | 1A10T   | 0.05             |
| A | T | G | A | C | T | C | A | G | G  | A  | 1A10G   | 0.07             |
| A | T | G | A | C | T | C | C | G | C  | A  | 1A8C    | 0.23             |
| A | T | G | A | C | T | C | G | G | C  | A  | 1A8G    | 0.73             |
| A | T | G | A | C | T | C | T | G | C  | A  | 1A8T    | 0.61             |
| A | T | G | A | C | T | G | A | G | C  | A  | 1A7G    | 0.41             |
| A | T | G | A | C | T | T | A | G | C  | A  | 1A7T    | 0.78             |
| A | T | G | A | C | T | T | G | G | C  | A  | 1A7T8G  | 0.73             |
| A | T | G | C | C | A | C | A | G | C  | A  | 1A4C6A  | 0.00             |
| A | T | G | C | C | C | C | A | G | C  | A  | 1A4C6C  | 0.00             |
| A | T | G | C | C | T | C | A | G | C  | A  | 1A4C    | 0.00             |
| A | T | G | G | C | T | A | A | G | C  | A  | 1A4G7A  | 0.00             |
| A | T | G | G | C | T | C | A | G | C  | A  | 1A4G    | 0.00             |
| A | T | G | T | C | A | C | A | G | C  | A  | 1A4T6A  | 0.00             |
| A | T | G | T | C | T | A | A | G | C  | A  | 1A4T7A  | 0.00             |
| A | T | G | T | C | T | C | A | G | C  | A  | 1A4T    | 0.00             |
| A | T | T | A | C | A | C | A | G | C  | A  | 1A3T6A  | 0.02             |
| A | T | T | A | C | C | C | A | G | C  | A  | 1A3T6C  | 0.00             |
| A | T | T | A | C | T | A | A | G | C  | A  | 1A3T7A  | 0.01             |
| A | T | T | A | C | T | C | A | G | C  | A  | 1A3T    | 0.06             |
| A | T | T | A | C | T | C | A | G | G  | A  | 1A3T10G | 0.00             |
| A | T | T | A | C | T | T | A | G | C  | A  | 1A3T7T  | 0.00             |
| A | T | T | T | C | T | C | A | G | C  | A  | 1A3T4T  | 0.00             |

Table S8.

| 1 | 2 | 3 | 4 | 5 | 6 | 7 | 8 | 9 | 10 | 11 | Name   | Measured binding |
|---|---|---|---|---|---|---|---|---|----|----|--------|------------------|
| C | T | T | A | C | T | C | A | G | C  | A  | 1C3T   | 0.17             |
| T | T | T | A | C | T | C | A | G | C  | A  | 1T3T   | 0.03             |
| G | T | G | A | C | T | C | A | G | G  | C  | 10G11C | 0.33             |
| G | T | G | A | C | T | C | A | G | G  | T  | 10G11T | 0.30             |
| G | T | G | A | C | T | C | A | G | G  | G  | 10G11G | 0.00             |
| G | T | G | A | C | T | C | A | G | T  | C  | 10T11C | 0.23             |
| G | T | G | A | C | T | C | A | G | T  | T  | 10T11T | 0.18             |
| G | T | G | A | C | T | C | A | G | T  | G  | 10T11G | 0.30             |
| G | T | G | A | C | T | C | A | T | C  | C  | 9T11C  | 0.30             |
| G | T | G | A | C | T | C | A | T | C  | T  | 9T11T  | 0.37             |
| G | T | G | A | C | T | C | A | T | C  | G  | 9T11G  | 0.55             |
| A | T | G | A | C | T | C | A | T | C  | A  | 1A9T   | 0.69             |
| G | T | G | A | C | T | C | A | G | A  | G  | 10A11G | 0.09             |
| G | T | G | A | C | T | C | A | G | A  | C  | 10A11C | 0.18             |
| G | T | G | A | C | T | C | A | G | A  | T  | 10A11T | 0.13             |
| G | T | G | A | C | T | C | A | A | C  | G  | 9A11G  | 0.32             |
| G | T | G | A | C | T | C | A | A | C  | C  | 9A11C  | 0.18             |
| G | T | G | A | C | T | C | A | A | C  | T  | 9A11T  | 0.24             |
| G | T | G | A | C | T | C | A | C | C  | G  | 9C11G  | 0.13             |
| G | T | G | A | C | T | C | A | C | C  | C  | 9C11C  | 0.04             |
| G | T | G | A | C | T | C | A | C | C  | T  | 9C11T  | 0.10             |
| G | T | G | A | C | C | C | C | G | C  | A  | 6C8C   | 0.01             |
| G | T | G | A | C | G | G | G | G | C  | A  | 6G7G8G | 0.59             |
| G | T | G | A | C | T | T | T | G | C  | A  | 7T8T   | 0.68             |
| G | T | G | A | C | A | C | T | G | C  | A  | 6A8T   | 0.64             |
| G | T | G | A | C | C | T | A | G | C  | A  | 6C7T   | 0.36             |
| G | T | G | A | C | C | G | A | G | C  | A  | 6C7G   | 0.21             |
| G | T | G | A | C | C | C | T | G | C  | A  | 6C7C8T | 0.16             |
| G | T | G | A | C | G | G | A | G | C  | A  | 6G7G   | 0.50             |
| G | T | G | A | C | G | A | A | G | C  | A  | 6G7A   | 0.66             |
| G | T | G | A | C | G | T | A | G | C  | A  | 6G7T   | 0.01             |
| G | T | G | A | C | G | C | C | G | C  | A  | 6G8C   | 0.37             |
| G | T | G | A | C | G | C | G | G | C  | A  | 6G8G   | 0.64             |
| G | T | G | A | C | G | C | T | G | C  | A  | 6G8T   | 0.72             |
| G | T | G | A | C | T | A | C | G | C  | A  | 7A8C   | 0.49             |
| G | T | G | A | C | T | A | T | G | C  | A  | 7A8T   | 0.62             |
| G | T | G | A | C | T | G | C | G | C  | A  | 7G8C   | 0.46             |
| G | T | G | A | C | T | G | G | G | C  | A  | 7G8G   | 0.55             |
| G | T | G | A | C | T | G | T | G | C  | A  | 7G8T   | 0.58             |
| G | T | G | A | C | T | T | C | G | C  | A  | 7T8C   | 0.47             |
| G | T | G | A | C | T | T | G | G | C  | A  | 7T8G   | 0.01             |
| A | T | G | A | T | T | C | A | G | C  | A  | 1A5T   | 0.59             |
| A | T | G | A | G | T | C | A | G | C  | A  | 1A5G   | 0.85             |
| A | T | G | A | A | T | C | A | G | C  | A  | 1A5A   | 0.64             |
| A | T | G | A | C | T | C | A | G | C  | G  | 1A11G  | 0.00             |
| A | T | G | A | C | T | C | A | G | C  | C  | 1A11C  | 0.73             |
| A | T | G | A | C | T | C | A | G | C  | T  | 1A11T  | 0.76             |

|   |   |   |   |   |   |   |   |   |   |   |              |      |
|---|---|---|---|---|---|---|---|---|---|---|--------------|------|
| A | T | G | A | T | A | T | A | G | C | A | 1A5T6A7T     | 0.36 |
| A | T | G | A | G | A | T | A | G | C | A | 1A5G6A7T     | 0.34 |
| A | T | G | A | A | A | T | A | G | C | A | 1A5A6A7T     | 0.11 |
| A | T | G | A | C | A | T | A | G | C | G | 1A6A7T11G    | 0.62 |
| A | T | G | A | C | A | T | A | G | C | C | 1A6A7T11C    | 0.24 |
| A | T | G | A | C | A | T | A | G | C | T | 1A6A7T11T    | 0.40 |
| A | T | G | A | T | T | C | A | G | T | A | 1A5T10T      | 0.04 |
| A | T | G | A | G | T | C | A | G | T | A | 1A5G10T      | 0.04 |
| A | T | G | A | A | T | C | A | G | T | A | 1A5A10T      | 0.03 |
| A | T | G | A | C | T | C | A | G | T | G | 1A10T11G     | 0.37 |
| A | T | G | A | C | T | C | A | G | T | C | 1A10T11C     | 0.39 |
| A | T | G | A | C | T | C | A | G | T | T | 1A10T11T     | 0.36 |
| A | T | G | A | A | T | A | A | G | C | G | 1A5A7A11G    | 0.18 |
| A | T | G | A | T | T | A | A | G | C | C | 1A5T7A11C    | 0.08 |
| A | T | G | A | G | T | A | A | G | C | T | 1A5G7A11T    | 0.40 |
| A | T | G | A | G | A | C | G | G | C | G | 1A5G6A8G11G  | 0.06 |
| A | T | G | A | A | A | C | G | G | C | C | 1A5A6A8G11C  | 0.00 |
| A | T | G | A | T | A | C | G | G | C | T | 1A5T6A8G11T  | 0.02 |
| A | T | G | A | T | T | A | A | G | G | G | 1A5T7A10G11G | 0.14 |
| A | T | G | A | G | T | A | A | G | G | C | 1A5G7A10G11C | 0.16 |
| A | T | G | A | A | T | A | A | G | G | T | 1A5A7A10G11T | 0.01 |
| A | T | G | A | T | G | C | A | G | C | G | 1A5T6G11G    | 0.39 |
| C | T | G | A | G | G | C | A | G | C | C | 1C5G6G11C    | 0.00 |
| C | T | G | A | C | T | C | A | G | T | A | 1C10T        | 0.05 |
| T | T | G | A | C | T | C | A | G | T | A | 1T10T        | 0.00 |
| G | T | G | A | C | A | T | A | G | C | A | 6A7T         | 0.61 |
| C | T | G | A | C | A | T | A | G | C | A | 1C6A7T       | 0.18 |
| T | T | G | A | C | A | T | A | G | C | A | 1T6A7T       | 0.01 |
| T | T | G | A | A | G | C | A | G | C | T | 1T5A6G11T    | 0.00 |
| A | T | G | A | T | T | G | A | G | C | G | 1A5T7G11G    | 0.11 |
| C | T | G | A | G | T | G | A | G | C | C | 1C5G7G11C    | 0.00 |
| T | T | G | A | A | T | G | A | G | C | T | 1T5A7G11T    | 0.00 |
| A | T | G | A | T | T | A | A | G | T | G | 1A5T7A10T11G | 0.00 |
| C | T | G | A | G | T | A | A | G | T | C | 1C5G7A10T11C | 0.00 |
| T | T | G | A | A | T | A | A | G | T | T | 1T5A7A10T11T | 0.01 |
